# Supplementary material for: Mitochondrial Function of CKS2 Oncoprotein Links Oxidative Phosphorylation with Cell Division in Chemoradioresistant Cervical Cancer
Source: PubMed Central journal article supplement — Neoplasia. 2019 Mar 8;21(4):353–62. doi: 10.1016/j.neo.2019.01.002 (PMC6411633; doi:10.1016/j.neo.2019.01.002), 2019-03-08
Supplement: mmc1.pdf [file mmc1.pdf]

## Specificity of the SPSS1 antibody

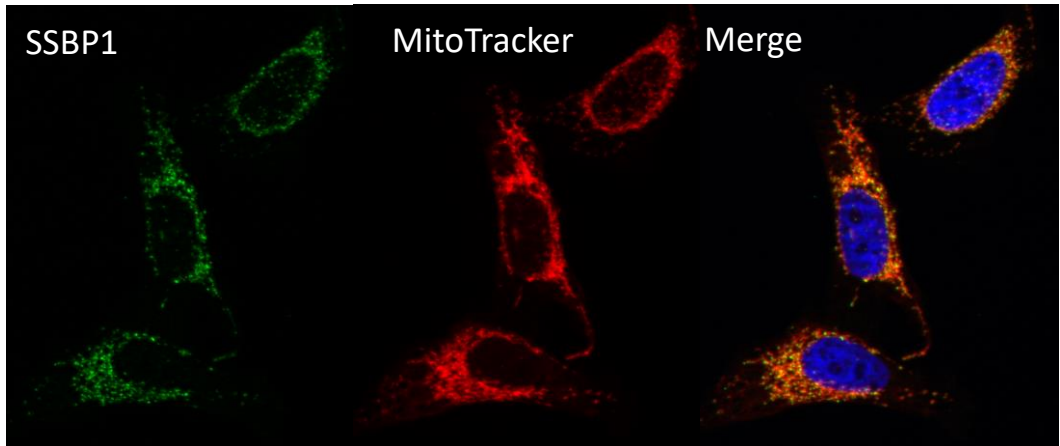

**Supplementary Figure S1.** SSBP1 (green) was expressed only in the cytoplasm of HeLa cells, and was visible as green foci often close to the cell nucleus. The SSBP1 signal co-localized perfectly with a MitoTracker probe (red), demonstrating high specificity of the antibody. Staining was performed by seeding cells on cover slips overnight before treating them with MitoTracker Deep Red FM (300 nM; Invitrogen) for 45 minutes at 37°C in the dark. Cells were then rinsed with warm PBS and fixed with 10% neutral buffered formalin in 10 minutes at room temperature and ice-cold acetone (-20°C) in 5 minutes, protected from light, washed three times with PBS and treated according to the immunofluorescence protocol.

## Quantification of PLA foci in immunofluorescence images of adherent cells on cover slips

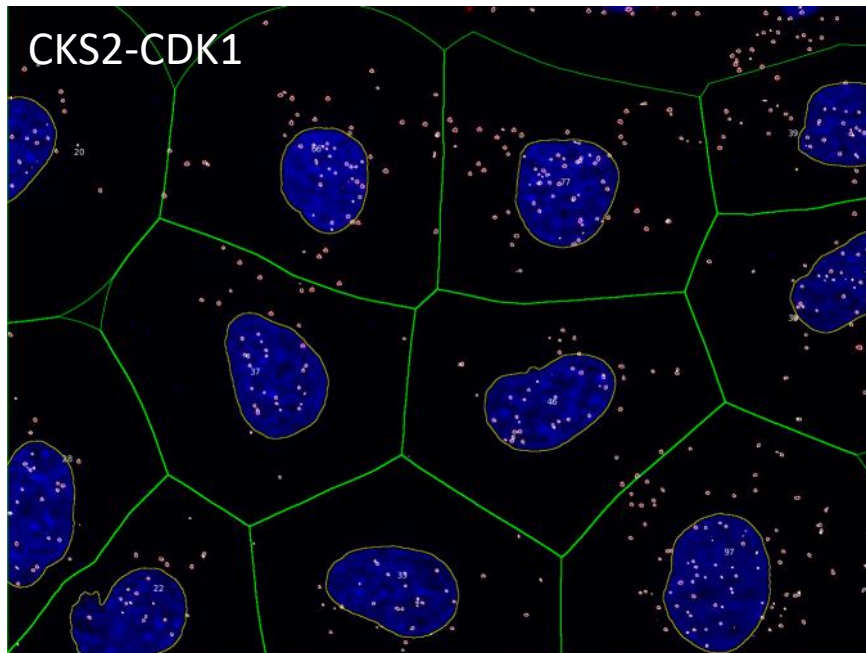

**Supplementary Figure S2.** (A), Identification of cells and corresponding PLA foci with the single cell analysis algorithm in BlobFinder software in a typical image of CKS2-CDK1 foci. Cells and nuclei (blue) are outlined in green and yellow, respectively. PLA foci are indicated as orange spots.

## Negative PLA controls in HeLa cells

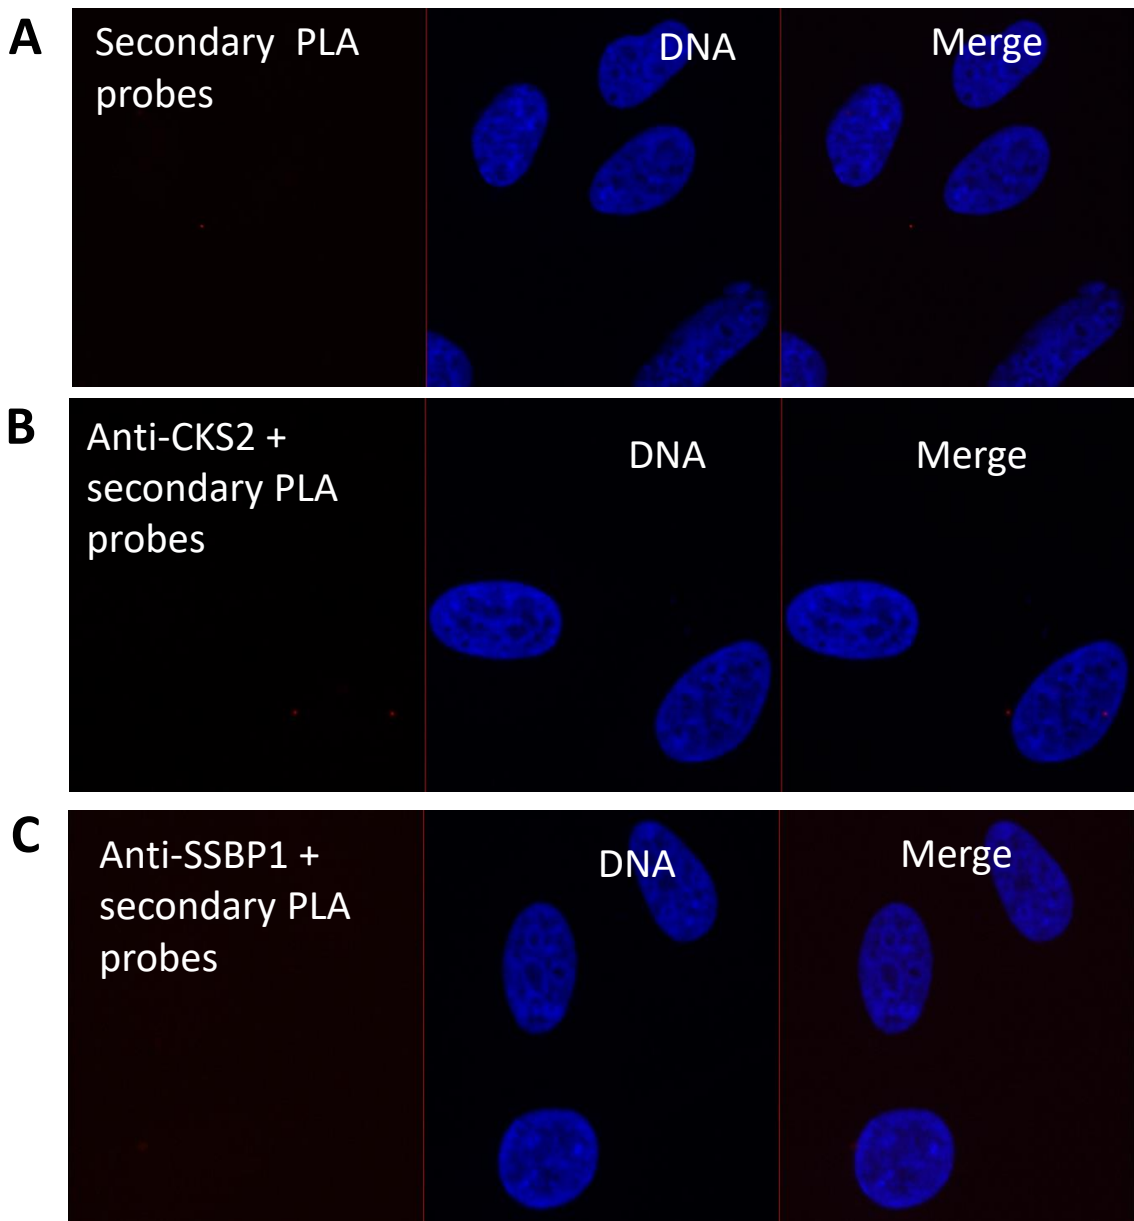

**Supplementary Figure S3.** (A), secondary PLA probes without primary antibodies. (B), primary CKS2 (anti-CKS2) antibody and both secondary PLA probes. (C), primary SSBP1 (anti-SSBP1) antibody and both secondary PLA probes. (A-C), No PLA signal was detected, demonstrating the need of two primary and two secondary antibodies for foci detection. The images were acquired using the same gain as in Figure 2.

# Expression pattern of CKS2 and CDK1 protein in HeLa cells

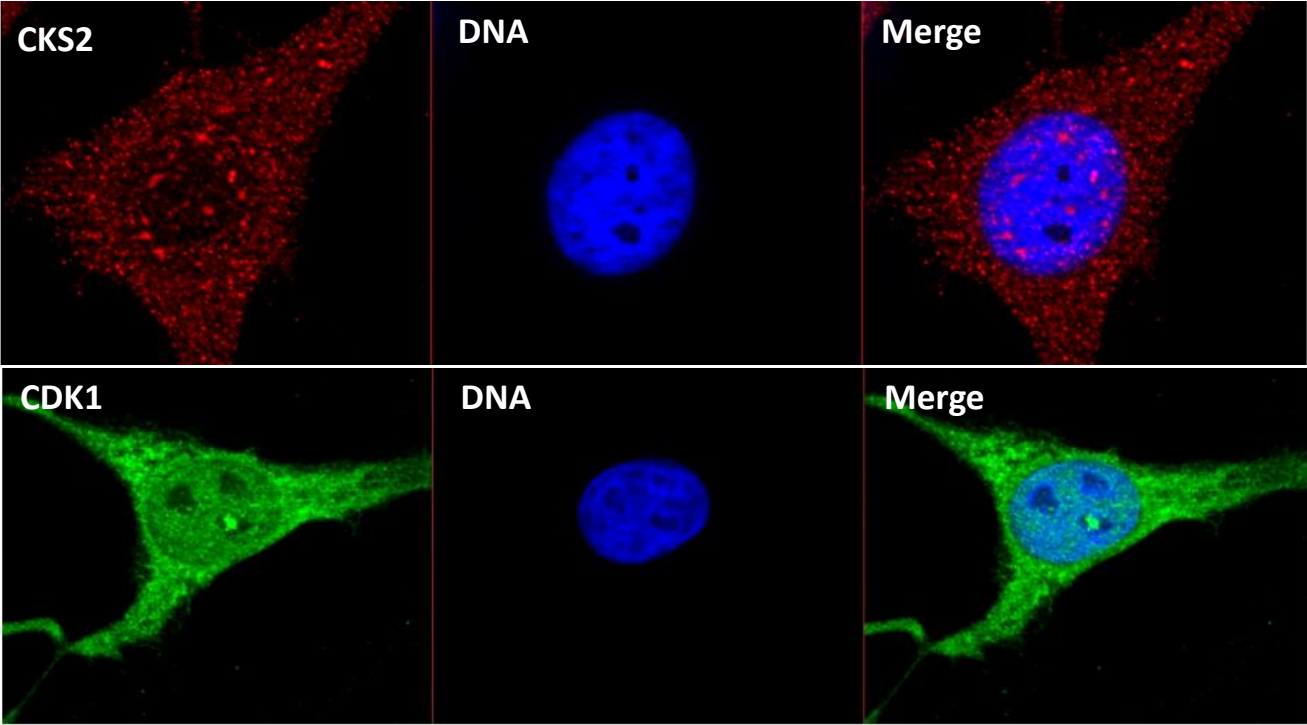

**Supplementary Figure S4.** Typical immunofluorescence images of CKS2 (red, upper), CDK1 (green, lower), DNA (blue) and the images merged.

## CKS2-CDK1 PLA foci in HeLa cells

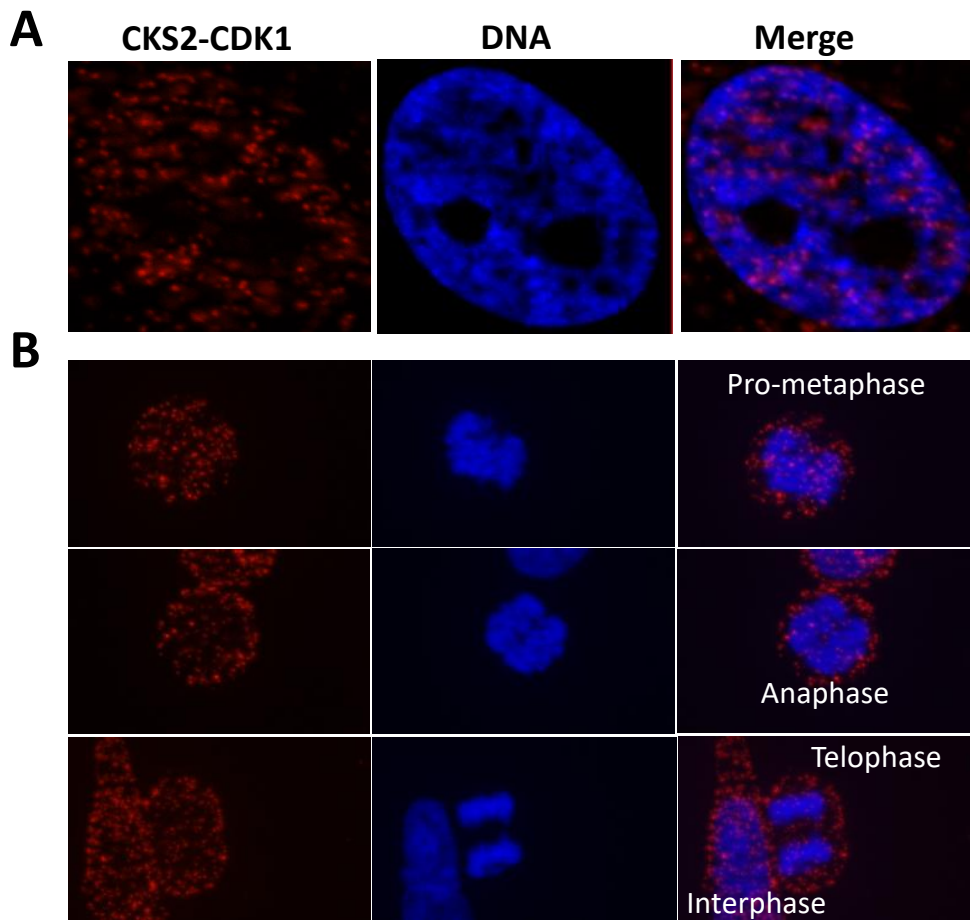

**Supplementary Figure S5.** (A), Nuclear CKS2-CDK1 PLA foci in interphase cells. (B), Nuclear and cytoplasmic CKS2-CDK1 PLA foci in interphase and mitotic cells. (A, B), Typical immunofluorescence images of CKS2-CDK1 (red), DNA (blue) and the two images merged are shown.
