# Supplementary material for: Mitochondrial Function of CKS2 Oncoprotein Links Oxidative Phosphorylation with Cell Division in Chemoradioresistant Cervical Cancer
Source: PubMed Central journal article supplement — Neoplasia. 2019 Mar 8;21(4):353–62. doi: 10.1016/j.neo.2019.01.002 (PMC6411633; doi:10.1016/j.neo.2019.01.002), 2019-03-08
Supplement: mmc2.pdf [file mmc2.pdf]

**Supplementary Table S1. Patient characteristics**

| Characteristic                                                                                                                    | Cohort 1 <sup>a</sup> | Cohort 2 <sup>b</sup> | CKS2 immunohistochemistry cohort <sup>c</sup> |
|-----------------------------------------------------------------------------------------------------------------------------------|-----------------------|-----------------------|-----------------------------------------------|
| No. of patients                                                                                                                   | 150                   | 135                   | 47                                            |
| Age (years)                                                                                                                       |                       |                       |                                               |
| Median                                                                                                                            | 54.9                  | 52.9                  | 54.7                                          |
| Range                                                                                                                             | 23.8-84.2             | 21.8-83.9             | 29.7 – 84.2                                   |
| Histology                                                                                                                         |                       |                       |                                               |
| Squamous                                                                                                                          | 150                   | 135                   | 45                                            |
| Adenosquamous                                                                                                                     |                       |                       | 2                                             |
| FIGO stage                                                                                                                        |                       |                       |                                               |
| 1B-2B                                                                                                                             | 103                   | 104                   | 28                                            |
| 3B-4A                                                                                                                             | 47                    | 31                    | 19                                            |
| Tumor volume (cm <sup>3</sup> ) <sup>d</sup>                                                                                      |                       |                       |                                               |
| Median                                                                                                                            | 43.8                  | 30.8                  | 47.8                                          |
| Range                                                                                                                             | 1.9-321.0             | 2.8-266.8             | 2.8 – 321.0                                   |
| Pelvic lymph node status                                                                                                          |                       |                       |                                               |
| Positive                                                                                                                          | 64                    |                       | 22                                            |
| Negative                                                                                                                          | 86                    |                       | 25                                            |
| Abbreviations: FIGO, Federation International de Gynecologie et d'Obstetrique.                                                    |                       |                       |                                               |
| <sup>a</sup> Assayed with WG-6 v3 Illumina bead arrays.                                                                           |                       |                       |                                               |
| <sup>b</sup> Assayed with HT-12 v4 Illumina bead arrays.                                                                          |                       |                       |                                               |
| <sup>c</sup> Includes 41 cohort 1 patients.                                                                                       |                       |                       |                                               |
| <sup>d</sup> Calculated from pre-treatment magnetic resonance images based on 3 orthogonal diameters (a,b,c) as $(\pi/6)^x abc$ . |                       |                       |                                               |

**Supplementary Table S2A. Cellular compartments enriched in the transcriptional program associated with CKS2 expression in patients**

Top 20 cellular components from GSEA analysis are listed.

| <b>Cohort 1</b>                  |                             |                                |                               |                |                    |
|----------------------------------|-----------------------------|--------------------------------|-------------------------------|----------------|--------------------|
| <b>Gene Set Name</b>             | <b>Cellular compartment</b> | <b># Genes in Gene Set (K)</b> | <b># Genes in Overlap (k)</b> | <b>p-value</b> | <b>FDR q-value</b> |
| GO_CATALYTIC_COMPLEX             |                             | 1038                           | 194                           | 2.26E-68       | 1.31E-65           |
| GO_MITOCHONDRION                 | Mitochondrion               | 1633                           | 240                           | 1.30E-63       | 3.54E-61           |
| GO_NUCLEOPLASM_PART              | Nucleus                     | 708                            | 154                           | 1.83E-63       | 3.54E-61           |
| GO_RIBONUCLEOPROTEIN_COMPLEX     |                             | 721                            | 153                           | 1.61E-61       | 2.33E-59           |
| GO_CHROMOSOME                    | Chromosome                  | 880                            | 159                           | 6.51E-54       | 7.55E-52           |
| GO_ENVELOPE                      | Envelope                    | 1090                           | 173                           | 2.32E-50       | 2.25E-48           |
| GO_TRANSFERASE_COMPLEX           |                             | 703                            | 135                           | 5.58E-49       | 4.63E-47           |
| GO_MITOCHONDRIAL_PART            | Mitochondrion               | 953                            | 155                           | 1.68E-46       | 1.22E-44           |
| GO_NUCLEOLUS                     | Nucleus                     | 848                            | 145                           | 3.46E-46       | 2.23E-44           |
| GO_CYTOSKELETON                  | Cytoskeleton                | 1967                           | 233                           | 5.47E-45       | 3.17E-43           |
| GO_MICROTUBULE_CYTOSKELETON      | Cytoskeleton                | 1068                           | 154                           | 1.21E-39       | 6.41E-38           |
| GO_MITOCHONDRIAL_ENVELOPE        | Mitochondrion               | 691                            | 119                           | 2.46E-38       | 1.19E-36           |
| GO_CYTOSKELETAL_PART             | Cytoskeleton                | 1436                           | 172                           | 9.51E-34       | 4.24E-32           |
| GO_ORGANELLE_INNER_MEMBRANE      | Envelope                    | 525                            | 94                            | 7.33E-32       | 3.04E-30           |
| GO_MICROTUBULE_ORGANIZING_CENTER | Cytoskeleton                | 623                            | 101                           | 1.87E-30       | 7.25E-29           |
| GO_CHROMOSOMAL_REGION            | Chromosome                  | 330                            | 69                            | 7.20E-28       | 2.61E-26           |
| GO_CENTROSOME                    | Cytoskeleton                | 487                            | 84                            | 1.98E-27       | 6.75E-26           |
| GO_CHROMOSOME_CENTROMERIC_REGION | Chromosome                  | 174                            | 50                            | 2.72E-27       | 8.78E-26           |
| GO_NUCLEAR_BODY                  | Nucleus                     | 349                            | 69                            | 2.40E-26       | 7.33E-25           |
| GO_RIBOSOME                      | Others                      | 226                            | 55                            | 6.45E-26       | 1.87E-24           |

| <b>Cohort 2</b>                  |                             |                                |                               |                |                    |
|----------------------------------|-----------------------------|--------------------------------|-------------------------------|----------------|--------------------|
| <b>Gene Set Name</b>             | <b>Cellular compartment</b> | <b># Genes in Gene Set (K)</b> | <b># Genes in Overlap (k)</b> | <b>p-value</b> | <b>FDR q-value</b> |
| GO_MITOCHONDRION                 | Mitochondrion               | 1633                           | 282                           | 4.98E-92       | 2.89E-89           |
| GO_RIBONUCLEOPROTEIN_COMPLEX     |                             | 721                            | 164                           | 9.83E-71       | 2.85E-68           |
| GO_MITOCHONDRIAL_PART            | Mitochondrion               | 953                            | 187                           | 1.45E-69       | 2.80E-67           |
| GO_ENVELOPE                      | Envelope                    | 1090                           | 190                           | 4.87E-62       | 7.07E-60           |
| GO_CHROMOSOME                    | Chromosome                  | 880                            | 168                           | 1.20E-60       | 1.39E-58           |
| GO_MITOCHONDRIAL_ENVELOPE        | Mitochondrion               | 691                            | 143                           | 3.54E-56       | 3.42E-54           |
| GO_NUCLEOLUS                     | Nucleus                     | 848                            | 158                           | 1.51E-55       | 1.25E-53           |
| GO_CATALYTIC_COMPLEX             |                             | 1038                           | 172                           | 6.91E-53       | 5.01E-51           |
| GO_ORGANELLE_INNER_MEMBRANE      | Envelope                    | 525                            | 113                           | 2.67E-46       | 1.72E-44           |
| GO_NUCLEOPLASM_PART              | Nucleus                     | 708                            | 130                           | 4.86E-45       | 2.82E-43           |
| GO_TRANSFERASE_COMPLEX           |                             | 703                            | 118                           | 5.49E-37       | 2.89E-35           |
| GO_RIBOSOME                      | Others                      | 226                            | 65                            | 3.87E-35       | 1.87E-33           |
| GO_CHROMOSOMAL_REGION            | Chromosome                  | 330                            | 77                            | 1.91E-34       | 8.54E-33           |
| GO_MICROTUBULE_CYTOSKELETON      | Cytoskeleton                | 1068                           | 144                           | 6.33E-34       | 2.62E-32           |
| GO_CYTOSKELETON                  | Cytoskeleton                | 1967                           | 207                           | 1.21E-32       | 4.67E-31           |
| GO_MITOCHONDRIAL_MATRIX          | Mitochondrion               | 412                            | 81                            | 1.39E-30       | 5.06E-29           |
| GO_CHROMOSOME_CENTROMERIC_REGION | Chromosome                  | 174                            | 51                            | 2.66E-28       | 9.08E-27           |
| GO_RIBOSOMAL_SUBUNIT             | Others                      | 163                            | 49                            | 8.31E-28       | 2.68E-26           |
| GO_MICROTUBULE_ORGANIZING_CENTER | Cytoskeleton                | 623                            | 96                            | 2.50E-27       | 7.63E-26           |
| GO_CYTOSKELETAL_PART             | Cytoskeleton                | 1436                           | 154                           | 3.16E-25       | 9.18E-24           |

| <b>Immunohistochemistry cohort</b> |                             |                                |                               |                |                    |
|------------------------------------|-----------------------------|--------------------------------|-------------------------------|----------------|--------------------|
| <b>Gene Set Name</b>               | <b>Cellular compartment</b> | <b># Genes in Gene Set (K)</b> | <b># Genes in Overlap (k)</b> | <b>p-value</b> | <b>FDR q-value</b> |
| GO_CATALYTIC_COMPLEX               |                             | 1038                           | 116                           | 2.04E-23       | 1.18E-20           |
| GO_CYTOSKELETON                    | Cytoskeleton                | 1967                           | 174                           | 6.04E-23       | 1.75E-20           |
| GO_MITOCHONDRION                   | Mitochondrion               | 1633                           | 150                           | 2.12E-21       | 4.09E-19           |
| GO_TRANSFERASE_COMPLEX             |                             | 703                            | 83                            | 1.58E-18       | 2.29E-16           |
| GO_MICROTUBULE_CYTOSKELETON        | Cytoskeleton                | 1068                           | 107                           | 3.58E-18       | 4.15E-16           |
| GO_NUCLEOPLASM_PART                | Nucleus                     | 708                            | 82                            | 8.07E-18       | 7.80E-16           |
| GO_RIBONUCLEOPROTEIN_COMPLEX       |                             | 721                            | 82                            | 2.38E-17       | 1.97E-15           |
| GO_CYTOSKELETAL_PART               | Cytoskeleton                | 1436                           | 127                           | 5.81E-17       | 4.21E-15           |
| GO_VACUOLE                         | Others                      | 1180                           | 110                           | 2.09E-16       | 1.34E-14           |
| GO_CHROMOSOME                      | Chromosome                  | 880                            | 88                            | 4.06E-15       | 2.36E-13           |
| GO_ENVELOPE                        | Envelope                    | 1090                           | 98                            | 8.69E-14       | 4.58E-12           |
| GO_NUCLEAR_BODY                    | Nucleus                     | 349                            | 48                            | 9.83E-14       | 4.75E-12           |
| GO_VACUOLAR_MEMBRANE               | Others                      | 587                            | 65                            | 1.69E-13       | 7.55E-12           |
| GO_VACUOLAR_PART                   | Others                      | 694                            | 72                            | 2.19E-13       | 9.06E-12           |
| GO_NUCLEAR_SPECK                   | Nucleus                     | 194                            | 33                            | 2.01E-12       | 7.76E-11           |
| GO_MICROTUBULE_ORGANIZING_CENTER   | Cytoskeleton                | 623                            | 65                            | 2.50E-12       | 9.05E-11           |
| GO_CELL_PROJECTION                 | Cytoskeleton                | 1786                           | 133                           | 4.37E-12       | 1.49E-10           |
| GO_GOLGI_APPARATUS                 | Others                      | 1445                           | 114                           | 4.67E-12       | 1.50E-10           |
| GO_INTRACELLULAR_VESICLE           | Others                      | 1259                           | 101                           | 3.13E-11       | 9.54E-10           |
| GO_LYTIC_VACUOLE                   | Others                      | 526                            | 56                            | 3.72E-11       | 1.08E-09           |

**Supplementary Table S2B. Hallmarks enriched in the transcriptional program associated with CKS2 expression in patients**

Top 20 hallmarks from GSEA analysis are listed.

| <b>Cohort 1</b>                    |                                |                               |                |                    |
|------------------------------------|--------------------------------|-------------------------------|----------------|--------------------|
| <b>Gene Set Name</b>               | <b># Genes in Gene Set (K)</b> | <b># Genes in Overlap (k)</b> | <b>p-value</b> | <b>FDR q-value</b> |
| HALLMARK_E2F_TARGETS               | 200                            | 53                            | 5.91E-27       | 2.96E-25           |
| HALLMARK_G2M_CHECKPOINT            | 200                            | 48                            | 1.61E-22       | 2.68E-21           |
| HALLMARK_MYC_TARGETS_V1            | 200                            | 48                            | 1.61E-22       | 2.68E-21           |
| HALLMARK_OXIDATIVE_PHOSPHORYLATION | 200                            | 47                            | 1.14E-21       | 1.43E-20           |
| HALLMARK_DNA_REPAIR                | 150                            | 35                            | 2.09E-16       | 2.09E-15           |
| HALLMARK_MITOTIC_SPINDLE           | 200                            | 40                            | 4.67E-16       | 3.89E-15           |
| HALLMARK_MTORC1_SIGNALING          | 200                            | 27                            | 1.80E-07       | 1.28E-06           |
| HALLMARK_P53_PATHWAY               | 200                            | 26                            | 6.32E-07       | 3.95E-06           |
| HALLMARK_ADIPOGENESIS              | 200                            | 25                            | 2.13E-06       | 1.18E-05           |
| HALLMARK_PROTEIN_SECRETION         | 96                             | 16                            | 3.58E-06       | 1.79E-05           |
| HALLMARK_UNFOLDED_PROTEIN_RESPONSE | 113                            | 17                            | 7.55E-06       | 3.43E-05           |
| HALLMARK_FATTY_ACID_METABOLISM     | 158                            | 20                            | 1.78E-05       | 7.40E-05           |
| HALLMARK_APOPTOSIS                 | 161                            | 20                            | 2.34E-05       | 9.02E-05           |
| HALLMARK_UV_RESPONSE_UP            | 158                            | 19                            | 5.82E-05       | 2.08E-04           |
| HALLMARK_APICAL_JUNCTION           | 200                            | 21                            | 1.75E-04       | 5.23E-04           |
| HALLMARK_GLYCOLYSIS                | 200                            | 21                            | 1.75E-04       | 5.23E-04           |
| HALLMARK_PI3K_AKT_MTOR_SIGNALING   | 105                            | 14                            | 1.78E-04       | 5.23E-04           |
| HALLMARK_HEME_METABOLISM           | 200                            | 19                            | 1.18E-03       | 3.28E-03           |
| HALLMARK_PEROXISOME                | 104                            | 11                            | 5.45E-03       | 1.43E-02           |
| HALLMARK_INTERFERON_GAMMA_RESPONSE | 200                            | 17                            | 6.46E-03       | 1.54E-02           |

| <b>Cohort 2</b>                     |                                |                               |                |                    |
|-------------------------------------|--------------------------------|-------------------------------|----------------|--------------------|
| <b>Gene Set Name</b>                | <b># Genes in Gene Set (K)</b> | <b># Genes in Overlap (k)</b> | <b>p-value</b> | <b>FDR q-value</b> |
| HALLMARK_E2F_TARGETS                | 200                            | 73                            | 1.97E-47       | 4.92E-46           |
| HALLMARK_MYC_TARGETS_V1             | 200                            | 73                            | 1.97E-47       | 4.92E-46           |
| HALLMARK_G2M_CHECKPOINT             | 200                            | 55                            | 7.51E-29       | 1.25E-27           |
| HALLMARK_OXIDATIVE_PHOSPHORYLATION  | 200                            | 50                            | 2.68E-24       | 3.36E-23           |
| HALLMARK_DNA_REPAIR                 | 150                            | 39                            | 6.32E-20       | 6.32E-19           |
| HALLMARK_MITOTIC_SPINDLE            | 200                            | 44                            | 3.21E-19       | 2.67E-18           |
| HALLMARK_MTORC1_SIGNALING           | 200                            | 34                            | 8.53E-12       | 6.09E-11           |
| HALLMARK_MYC_TARGETS_V2             | 58                             | 14                            | 1.28E-07       | 8.01E-07           |
| HALLMARK_UNFOLDED_PROTEIN_RESPONSE  | 113                            | 19                            | 3.81E-07       | 2.12E-06           |
| HALLMARK_HEME_METABOLISM            | 200                            | 26                            | 6.09E-07       | 3.05E-06           |
| HALLMARK_PI3K_AKT_MTOR_SIGNALING    | 105                            | 16                            | 1.14E-05       | 5.20E-05           |
| HALLMARK_PROTEIN_SECRETION          | 96                             | 15                            | 1.57E-05       | 6.53E-05           |
| HALLMARK_ADIPOGENESIS               | 200                            | 23                            | 2.05E-05       | 7.90E-05           |
| HALLMARK_UV_RESPONSE_UP             | 158                            | 19                            | 5.66E-05       | 2.02E-04           |
| HALLMARK_INTERFERON_GAMMA_RESPONSE  | 200                            | 22                            | 6.05E-05       | 2.02E-04           |
| HALLMARK_SPERMATOGENESIS            | 135                            | 17                            | 7.67E-05       | 2.40E-04           |
| HALLMARK_GLYCOLYSIS                 | 200                            | 21                            | 1.70E-04       | 5.00E-04           |
| HALLMARK_FATTY_ACID_METABOLISM      | 158                            | 16                            | 1.41E-03       | 3.93E-03           |
| HALLMARK_WNT_BETA_CATENIN_SIGNALING | 42                             | 7                             | 1.99E-03       | 5.24E-03           |
| HALLMARK_INTERFERON_ALPHA_RESPONSE  | 97                             | 11                            | 3.14E-03       | 7.86E-03           |

| <b>Immunohistochemistry cohort</b>       |                                |                               |                |                    |
|------------------------------------------|--------------------------------|-------------------------------|----------------|--------------------|
| <b>Gene Set Name</b>                     | <b># Genes in Gene Set (K)</b> | <b># Genes in Overlap (k)</b> | <b>p-value</b> | <b>FDR q-value</b> |
| HALLMARK_MYC_TARGETS_V1                  | 200                            | 28                            | 8.69E-09       | 4.34E-07           |
| HALLMARK_E2F_TARGETS                     | 200                            | 26                            | 1.33E-07       | 3.32E-06           |
| HALLMARK_MTORC1_SIGNALING                | 200                            | 21                            | 5.60E-05       | 9.33E-04           |
| HALLMARK_APOPTOSIS                       | 161                            | 18                            | 8.27E-05       | 1.03E-03           |
| HALLMARK_G2M_CHECKPOINT                  | 200                            | 20                            | 1.62E-04       | 1.62E-03           |
| HALLMARK_UV_RESPONSE_DN                  | 144                            | 16                            | 2.16E-04       | 1.80E-03           |
| HALLMARK_PI3K_AKT_MTOR_SIGNALING         | 105                            | 13                            | 2.85E-04       | 2.03E-03           |
| HALLMARK_MITOTIC_SPINDLE                 | 200                            | 19                            | 4.47E-04       | 2.79E-03           |
| HALLMARK_UNFOLDED_PROTEIN_RESPONSE       | 113                            | 13                            | 5.84E-04       | 3.06E-03           |
| HALLMARK_UV_RESPONSE_UP                  | 158                            | 16                            | 6.12E-04       | 3.06E-03           |
| HALLMARK_ESTROGEN_RESPONSE_EARLY         | 200                            | 18                            | 1.17E-03       | 4.49E-03           |
| HALLMARK_HYPOXIA                         | 200                            | 18                            | 1.17E-03       | 4.49E-03           |
| HALLMARK_OXIDATIVE_PHOSPHORYLATION       | 200                            | 18                            | 1.17E-03       | 4.49E-03           |
| HALLMARK_FATTY_ACID_METABOLISM           | 158                            | 15                            | 1.71E-03       | 6.12E-03           |
| HALLMARK_DNA_REPAIR                      | 150                            | 14                            | 2.81E-03       | 9.37E-03           |
| HALLMARK_REACTIVE_OXIGEN_SPECIES_PATHWAY | 49                             | 7                             | 3.14E-03       | 9.83E-03           |
| HALLMARK_BILE_ACID_METABOLISM            | 112                            | 11                            | 5.21E-03       | 1.53E-02           |
| HALLMARK_GLYCOLYSIS                      | 200                            | 16                            | 6.70E-03       | 1.68E-02           |
| HALLMARK_HEME_METABOLISM                 | 200                            | 16                            | 6.70E-03       | 1.68E-02           |
| HALLMARK_INFLAMMATORY_RESPONSE           | 200                            | 16                            | 6.70E-03       | 1.68E-02           |

**Table S3. CKS2 correlating genes encoding mitochondrial proteins**

Spearman's rank test ( $\rho$ ,  $p$ -value) with Benjamini-Hochberg correction for multiple testing (FDR  $q$ -value) based on average expression value of two CKS2 probes on the arrays.

Cellular component ontology terms: Mitochondrion, Mitochondrion\_part, Mitochondrion\_envelope, Mitochondrial\_matrix

| PROBE_ID     | Entrz ID | Gene Symbol | HALLMARK                                                    | Cohort 1 |            |                | Cohort 2 |            |                |
|--------------|----------|-------------|-------------------------------------------------------------|----------|------------|----------------|----------|------------|----------------|
|              |          |             |                                                             | $\rho$   | $p$ -value | FDR $q$ -value | $\rho$   | $p$ -value | FDR $q$ -value |
| ILMN_1676846 | 6059     | ABCE1       | MYC TARGETS V1                                              | 0.30     | 2.1E-04    | 4.5E-03        | 0.49     | 1.5E-09    | 1.6E-07        |
| ILMN_1806408 | 37       | ACADVL      | OXPHOS; FATTY ACID METABOLISM                               | -0.43    | 4.3E-08    | 9.8E-06        | -0.49    | 1.2E-09    | 1.3E-07        |
| ILMN_2388507 | 207      | AKT1        |                                                             | -0.34    | 2.4E-05    | 9.0E-04        | -0.47    | 8.7E-09    | 6.7E-07        |
| ILMN_1665331 | 275      | AMT         |                                                             | -0.36    | 7.2E-06    | 3.8E-04        | -0.43    | 2.3E-07    | 9.0E-06        |
| ILMN_1677487 | 55139    | ANKZF1      |                                                             | -0.44    | 1.4E-08    | 4.4E-06        | -0.45    | 3.2E-08    | 1.9E-06        |
| ILMN_2052598 | 83787    | ARMC10      |                                                             | 0.33     | 3.9E-05    | 1.3E-03        | 0.42     | 5.4E-07    | 1.8E-05        |
| ILMN_1654497 | 84896    | ATAD1       |                                                             | 0.41     | 1.8E-07    | 2.7E-05        | 0.48     | 4.7E-09    | 4.1E-07        |
| ILMN_1701269 | 509      | ATP5C1      | OXPHOS, Complex V                                           | 0.45     | 9.8E-09    | 3.5E-06        | 0.52     | 6.7E-11    | 1.3E-08        |
| ILMN_1794912 | 10476    | ATP5H       | OXPHOS, Complex V                                           | 0.42     | 7.6E-08    | 1.4E-05        | 0.53     | 3.5E-11    | 8.0E-09        |
| ILMN_1652806 | 522      | ATP5J       | OXPHOS, Complex V                                           | 0.28     | 4.5E-04    | 7.8E-03        | 0.37     | 8.0E-06    | 1.6E-04        |
| ILMN_1791332 | 539      | ATP5O       | OXPHOS, Complex V                                           | 0.34     | 2.4E-05    | 9.0E-04        | 0.41     | 6.2E-07    | 2.0E-05        |
| ILMN_1700625 | 27109    | ATP5S       |                                                             | 0.32     | 5.1E-05    | 1.6E-03        | 0.42     | 3.5E-07    | 1.3E-05        |
| ILMN_1679782 | 282991   | BLOC1S2     |                                                             | 0.35     | 8.3E-06    | 4.2E-04        | 0.42     | 3.5E-07    | 1.3E-05        |
| ILMN_1783333 | 56942    | C16orf61    |                                                             | 0.42     | 8.7E-08    | 1.6E-05        | 0.45     | 3.0E-08    | 1.8E-06        |
| ILMN_1658110 | 125228   | C18orf19    |                                                             | 0.31     | 1.0E-04    | 2.6E-03        | 0.45     | 4.3E-08    | 2.4E-06        |
| ILMN_2406892 | 8725     | C19orf2     |                                                             | 0.28     | 6.2E-04    | 9.9E-03        | 0.39     | 3.9E-06    | 8.8E-05        |
| ILMN_2350607 | 79133    | C20orf7     |                                                             | 0.29     | 4.0E-04    | 7.2E-03        | 0.41     | 8.4E-07    | 2.5E-05        |
| ILMN_1758806 | 755      | C21orf2     |                                                             | -0.31    | 9.7E-05    | 2.5E-03        | -0.38    | 5.1E-06    | 1.1E-04        |
| ILMN_1671387 | 285343   | C3orf23     |                                                             | 0.30     | 1.6E-04    | 3.7E-03        | 0.41     | 6.6E-07    | 2.1E-05        |
| ILMN_1728057 | 135154   | C6orf57     |                                                             | 0.38     | 1.2E-06    | 1.1E-04        | 0.42     | 5.0E-07    | 1.7E-05        |
| ILMN_2081335 | 55744    | C7orf44     |                                                             | 0.37     | 4.4E-06    | 2.7E-04        | 0.43     | 2.6E-07    | 9.9E-06        |
| ILMN_1727618 | 137682   | C8orf38     |                                                             | 0.30     | 1.7E-04    | 3.8E-03        | 0.48     | 4.9E-09    | 4.3E-07        |
| ILMN_1709043 | 55848    | C9orf46     |                                                             | 0.32     | 7.7E-05    | 2.1E-03        | 0.54     | 1.3E-11    | 3.3E-09        |
| ILMN_1659189 | 84270    | C9orf89     |                                                             | 0.40     | 4.3E-07    | 5.0E-05        | 0.49     | 2.0E-09    | 2.0E-07        |
| ILMN_2410540 | 835      | CASP2       |                                                             | -0.32    | 5.6E-05    | 1.7E-03        | -0.43    | 1.8E-07    | 7.6E-06        |
| ILMN_1716368 | 201973   | CCDC111     |                                                             | 0.32     | 5.0E-05    | 1.5E-03        | 0.43     | 2.7E-07    | 1.0E-05        |
| ILMN_1703718 | 10574    | CCT7        | MYC TARGETS V1                                              | 0.29     | 3.3E-04    | 6.2E-03        | 0.44     | 7.7E-08    | 3.8E-06        |
| ILMN_1747911 | 983      | CDK1        | E2F TARGETS; G2M CHECKPOINT;<br>MITOTIC SPINDLE; GLYCOLYSIS | 0.54     | 1.1E-12    | 3.5E-09        | 0.61     | 0.0E+00    | 0.0E+00        |
| ILMN_1744295 | 1029     | CDKN2A      | E2F TARGETS                                                 | 0.31     | 1.1E-04    | 2.8E-03        | 0.56     | 1.7E-12    | 6.0E-10        |
| ILMN_1672149 | 118487   | CHCHD1      |                                                             | 0.45     | 7.2E-09    | 2.8E-06        | 0.51     | 1.8E-10    | 3.0E-08        |
| ILMN_1673026 | 54927    | CHCHD3      |                                                             | 0.33     | 3.2E-05    | 1.1E-03        | 0.46     | 2.7E-08    | 1.6E-06        |
| ILMN_1669281 | 1201     | CLN3        |                                                             | -0.35    | 1.0E-05    | 5.0E-04        | -0.43    | 2.5E-07    | 9.6E-06        |
| ILMN_1756572 | 27235    | COQ2        |                                                             | 0.40     | 4.6E-07    | 5.2E-05        | 0.55     | 7.0E-12    | 2.1E-09        |
| ILMN_1663512 | 1329     | COX5B       | OXPHOS, Complex IV                                          | 0.31     | 1.0E-04    | 2.6E-03        | 0.41     | 6.0E-07    | 2.0E-05        |
| ILMN_1783636 | 1337     | COX6A1      | OXPHOS, Complex IV                                          | 0.35     | 9.5E-06    | 4.7E-04        | 0.52     | 8.1E-11    | 1.5E-08        |
| ILMN_1701293 | 1347     | COX7A2      | OXPHOS, Complex IV                                          | 0.34     | 2.4E-05    | 9.1E-04        | 0.38     | 5.1E-06    | 1.1E-04        |
| ILMN_2184049 | 1349     | COX7B       | OXPHOS, Complex IV                                          | 0.31     | 9.8E-05    | 2.5E-03        | 0.51     | 2.3E-10    | 3.6E-08        |
| ILMN_2206272 | 728294   | D2HGDH      | FATTY ACID METABOLISM                                       | -0.44    | 1.8E-08    | 5.3E-06        | -0.39    | 2.4E-06    | 5.9E-05        |
| ILMN_1735402 | 8816     | DCAF5       |                                                             | -0.33    | 4.2E-05    | 1.4E-03        | -0.40    | 2.1E-06    | 5.2E-05        |
| ILMN_1747506 | 9704     | DHX34       |                                                             | -0.34    | 2.3E-05    | 8.8E-04        | -0.43    | 1.7E-07    | 7.3E-06        |
| ILMN_1724826 | 10059    | DNM1L       | PROTEIN SECRETION                                           | 0.30     | 2.2E-04    | 4.5E-03        | 0.50     | 6.5E-10    | 8.4E-08        |
| ILMN_1671568 | 55268    | ECHDC2      |                                                             | -0.42    | 8.1E-08    | 1.5E-05        | -0.52    | 9.6E-11    | 1.8E-08        |
| ILMN_1722309 | 2021     | ENDOG       |                                                             | 0.37     | 2.3E-06    | 1.7E-04        | 0.61     | 0.0E+00    | 0.0E+00        |
| ILMN_1701457 | 81889    | FAHD1       |                                                             | 0.30     | 2.1E-04    | 4.5E-03        | 0.42     | 4.0E-07    | 1.4E-05        |
| ILMN_2378696 | 84340    | GFM2        |                                                             | 0.36     | 6.7E-06    | 3.6E-04        | 0.42     | 5.3E-07    | 1.8E-05        |
| ILMN_1728467 | 27069    | GHITM       |                                                             | 0.37     | 3.1E-06    | 2.1E-04        | 0.44     | 6.7E-08    | 3.4E-06        |
| ILMN_1708414 | 54552    | GNL3L       |                                                             | -0.39    | 7.8E-07    | 7.7E-05        | -0.40    | 1.8E-06    | 4.7E-05        |
| ILMN_1723139 | 2820     | GPD2        | FATTY ACID METABOLISM                                       | 0.31     | 8.8E-05    | 2.3E-03        | 0.43     | 3.5E-07    | 1.3E-05        |
| ILMN_1670817 | 80273    | GRPEL1      | OXPHOS                                                      | 0.33     | 3.2E-05    | 1.1E-03        | 0.47     | 8.5E-09    | 6.5E-07        |
| ILMN_2393243 | 29083    | GTPBP8      |                                                             | 0.30     | 1.7E-04    | 3.8E-03        | 0.38     | 5.2E-06    | 1.1E-04        |
| ILMN_2398903 | 10456    | HAX1        | GLYCOLYSIS                                                  | 0.38     | 1.7E-06    | 1.3E-04        | 0.39     | 2.9E-06    | 6.9E-05        |
| ILMN_2057220 | 10247    | HRSP12      |                                                             | 0.28     | 6.6E-04    | 1.0E-02        | 0.41     | 9.5E-07    | 2.8E-05        |
| ILMN_1803775 | 3336     | HSPE1       | MYC TARGETS V1; MYC TARGETS V2;<br>MTORC                    | 0.30     | 2.3E-04    | 4.7E-03        | 0.53     | 4.7E-11    | 1.0E-08        |
| ILMN_2182198 | 3396     | ICT1        |                                                             | 0.33     | 4.8E-05    | 1.5E-03        | 0.50     | 4.4E-10    | 6.0E-08        |
| ILMN_2239754 | 3437     | IFIT3       |                                                             | 0.28     | 6.0E-04    | 9.6E-03        | 0.41     | 1.2E-06    | 3.4E-05        |
| ILMN_2219556 | 81689    | ISCA1       | OXPHOS; HEME METABOLISM                                     | 0.41     | 1.8E-07    | 2.7E-05        | 0.70     | 4.1E-21    | 5.3E-18        |
| ILMN_1701512 | 9692     | KIAA0391    |                                                             | 0.35     | 1.2E-05    | 5.5E-04        | 0.44     | 7.3E-08    | 3.6E-06        |
| ILMN_1765132 | 114294   | LACTB       |                                                             | 0.35     | 1.2E-05    | 5.4E-04        | 0.41     | 6.3E-07    | 2.0E-05        |
| ILMN_2400297 | 5601     | MAPK9       |                                                             | 0.28     | 5.6E-04    | 9.0E-03        | 0.38     | 4.4E-06    | 9.8E-05        |
| ILMN_2198499 | 92014    | MCART1      |                                                             | 0.33     | 3.5E-05    | 1.2E-03        | 0.44     | 1.3E-07    | 5.9E-06        |
| ILMN_1656913 | 4190     | MDH1        | OXPHOS; FATTY ACID METABOLISM;<br>GLYCOLYSIS                | 0.36     | 8.0E-06    | 4.1E-04        | 0.40     | 1.6E-06    | 4.3E-05        |
| ILMN_2048636 | 4200     | ME2         | GLYCOLYSIS                                                  | 0.30     | 1.8E-04    | 3.9E-03        | 0.48     | 4.9E-09    | 4.3E-07        |
| ILMN_2090558 | 27249    | MMADHC      |                                                             | 0.35     | 9.6E-06    | 4.7E-04        | 0.48     | 4.1E-09    | 3.6E-07        |
| ILMN_2076658 | 65008    | MRPL1       |                                                             | 0.36     | 8.3E-06    | 4.3E-04        | 0.51     | 3.3E-10    | 4.8E-08        |
| ILMN_2316540 | 65003    | MRPL11      | OXPHOS                                                      | 0.38     | 1.3E-06    | 1.1E-04        | 0.40     | 2.0E-06    | 5.2E-05        |
| ILMN_1671158 | 28998    | MRPL13      |                                                             | 0.35     | 9.8E-06    | 4.7E-04        | 0.59     | 7.3E-14    | 4.2E-11        |
| ILMN_2103720 | 29088    | MRPL15      | OXPHOS                                                      | 0.32     | 5.9E-05    | 1.7E-03        | 0.43     | 2.5E-07    | 9.7E-06        |
| ILMN_2230672 | 29074    | MRPL18      |                                                             | 0.32     | 5.7E-05    | 1.7E-03        | 0.53     | 2.9E-11    | 6.8E-09        |
| ILMN_2189424 | 55052    | MRPL20      |                                                             | 0.31     | 1.0E-04    | 2.6E-03        | 0.38     | 4.5E-06    | 9.9E-05        |
| ILMN_2348050 | 219927   | MRPL21      |                                                             | 0.41     | 1.8E-07    | 2.7E-05        | 0.51     | 1.8E-10    | 2.9E-08        |

|              |        |          |                                                             |       |         |         |       |         |         |
|--------------|--------|----------|-------------------------------------------------------------|-------|---------|---------|-------|---------|---------|
| ILMN_1663220 | 29093  | MRPL22   |                                                             | 0.35  | 1.3E-05 | 5.9E-04 | 0.43  | 2.1E-07 | 8.4E-06 |
| ILMN_1766154 | 51263  | MRPL30   |                                                             | 0.50  | 5.9E-11 | 7.4E-08 | 0.56  | 0.0E+00 | 0.0E+00 |
| ILMN_1749432 | 64983  | MRPL32   |                                                             | 0.39  | 8.0E-07 | 7.8E-05 | 0.49  | 1.5E-09 | 1.6E-07 |
| ILMN_1800197 | 64979  | MRPL36   |                                                             | 0.28  | 6.5E-04 | 1.0E-02 | 0.39  | 2.4E-06 | 5.9E-05 |
| ILMN_1726391 | 54148  | MRPL39   |                                                             | 0.39  | 1.1E-06 | 9.7E-05 | 0.50  | 5.4E-10 | 7.1E-08 |
| ILMN_2356895 | 28977  | MRPL42   |                                                             | 0.42  | 6.1E-08 | 1.2E-05 | 0.50  | 7.5E-10 | 9.2E-08 |
| ILMN_1808301 | 84311  | MRPL45   |                                                             | 0.35  | 1.0E-05 | 4.9E-04 | 0.45  | 4.8E-08 | 2.6E-06 |
| ILMN_1722838 | 26589  | MRPL46   |                                                             | 0.32  | 6.9E-05 | 1.9E-03 | 0.42  | 5.4E-07 | 1.8E-05 |
| ILMN_2391522 | 57129  | MRPL47   |                                                             | 0.42  | 1.0E-07 | 1.8E-05 | 0.56  | 1.9E-12 | 6.7E-10 |
| ILMN_1664833 | 54534  | MRPL50   |                                                             | 0.58  | 1.3E-14 | 6.0E-11 | 0.72  | 3.6E-23 | 5.0E-20 |
| ILMN_2097421 | 51258  | MRPL51   |                                                             | 0.29  | 3.4E-04 | 6.4E-03 | 0.47  | 6.6E-09 | 5.3E-07 |
| ILMN_1658486 | 116541 | MRPL54   |                                                             | 0.28  | 4.8E-04 | 8.2E-03 | 0.48  | 5.0E-09 | 4.3E-07 |
| ILMN_2405915 | 64963  | MRPS11   | OXPHOS                                                      | 0.34  | 1.9E-05 | 7.7E-04 | 0.37  | 8.6E-06 | 1.7E-04 |
| ILMN_1804851 | 51373  | MRPS17   |                                                             | 0.32  | 5.3E-05 | 1.6E-03 | 0.41  | 1.1E-06 | 3.2E-05 |
| ILMN_1658416 | 51023  | MRPS18C  |                                                             | 0.55  | 4.6E-13 | 1.6E-09 | 0.58  | 0.0E+00 | 0.0E+00 |
| ILMN_1655377 | 56945  | MRPS22   | OXPHOS                                                      | 0.28  | 6.0E-04 | 9.6E-03 | 0.53  | 5.5E-11 | 1.2E-08 |
| ILMN_1687359 | 51649  | MRPS23   |                                                             | 0.49  | 1.2E-10 | 1.4E-07 | 0.54  | 1.1E-11 | 2.9E-09 |
| ILMN_1718424 | 28957  | MRPS28   |                                                             | 0.36  | 5.3E-06 | 3.2E-04 | 0.46  | 3.2E-08 | 1.9E-06 |
| ILMN_1674706 | 10797  | MTHFD2   | E2F TARGETS; G2M CHECKPOINT;<br>MITOTIC SPINDLE; MTORC; UPR | 0.34  | 1.8E-05 | 7.3E-04 | 0.47  | 8.4E-09 | 6.5E-07 |
| ILMN_1772302 | 10588  | MTHFS    |                                                             | 0.35  | 1.4E-05 | 6.2E-04 | 0.42  | 5.4E-07 | 1.8E-05 |
| ILMN_1737738 | 55967  | NDUFA12  |                                                             | 0.38  | 1.4E-06 | 1.2E-04 | 0.51  | 3.3E-10 | 4.8E-08 |
| ILMN_1751258 | 4697   | NDUFA4   | OXPHOS, Complex I                                           | 0.30  | 1.6E-04 | 3.6E-03 | 0.48  | 5.3E-09 | 4.5E-07 |
| ILMN_1759729 | 4702   | NDUFA8   | OXPHOS, Complex I                                           | 0.29  | 2.9E-04 | 5.6E-03 | 0.52  | 1.0E-10 | 1.9E-08 |
| ILMN_1682857 | 91942  | NDUFAF2  |                                                             | 0.35  | 1.1E-05 | 5.1E-04 | 0.54  | 1.6E-11 | 3.9E-09 |
| ILMN_1770589 | 4710   | NDUFB4   | OXPHOS, Complex I                                           | 0.33  | 5.3E-05 | 1.6E-03 | 0.41  | 7.8E-07 | 2.4E-05 |
| ILMN_2369924 | 4712   | NDUFB6   | OXPHOS, Complex I                                           | 0.42  | 1.2E-07 | 2.0E-05 | 0.63  | 2.8E-16 | 2.5E-13 |
| ILMN_1733603 | 4717   | NDUFC1   | OXPHOS, Complex I                                           | 0.28  | 5.3E-04 | 8.7E-03 | 0.44  | 1.1E-07 | 5.2E-05 |
| ILMN_1812312 | 4724   | NDUFS4   | OXPHOS, Complex I                                           | 0.36  | 5.5E-06 | 3.2E-04 | 0.45  | 4.9E-08 | 2.7E-06 |
| ILMN_2406468 | 27247  | NFU1     |                                                             | 0.29  | 3.1E-04 | 5.9E-03 | 0.39  | 3.7E-06 | 8.5E-05 |
| ILMN_2414399 | 4830   | NME1     | MYC TARGETS V1; DNA REPAIR; E2F<br>TARGETS                  | 0.30  | 1.6E-04 | 3.7E-03 | 0.52  | 1.7E-10 | 2.8E-08 |
| ILMN_2389347 | 2908   | NR3C1    | HEME METABOLISM                                             | 0.28  | 5.3E-04 | 8.7E-03 | 0.45  | 4.0E-08 | 2.2E-06 |
| ILMN_1703324 | 23590  | PDSS1    |                                                             | 0.33  | 3.1E-05 | 1.1E-03 | 0.54  | 9.0E-12 | 2.6E-09 |
| ILMN_1689525 | 5366   | PMAIP1   |                                                             | 0.29  | 3.1E-04 | 6.0E-03 | 0.39  | 4.3E-06 | 9.5E-05 |
| ILMN_1662587 | 375775 | PNPLA7   |                                                             | -0.37 | 2.8E-06 | 1.9E-04 | -0.39 | 2.9E-06 | 6.9E-05 |
| ILMN_1687785 | 27068  | PPA2     |                                                             | 0.33  | 3.9E-05 | 1.3E-03 | 0.49  | 1.7E-09 | 1.8E-07 |
| ILMN_1748831 | 23368  | PPP1R13B |                                                             | -0.40 | 2.9E-07 | 3.7E-05 | -0.48 | 4.5E-09 | 4.0E-07 |
| ILMN_1810467 | 5518   | PPP2R1A  |                                                             | -0.42 | 9.2E-08 | 1.6E-05 | -0.49 | 2.3E-09 | 2.2E-07 |
| ILMN_2395969 | 10935  | PRDX3    | MYC TARGETS V1; OXPHOS;<br>ADIPOGENESIS                     | 0.31  | 1.2E-04 | 2.9E-03 | 0.38  | 7.2E-06 | 1.4E-04 |
| ILMN_1717707 | 118672 | PSTK     |                                                             | 0.33  | 3.1E-05 | 1.1E-03 | 0.42  | 5.4E-07 | 1.8E-05 |
| ILMN_2225709 | 26024  | PTCD1    |                                                             | -0.29 | 2.6E-04 | 5.1E-03 | -0.44 | 1.2E-07 | 5.5E-06 |
| ILMN_2311548 | 51651  | PTRH2    |                                                             | 0.30  | 1.7E-04 | 3.8E-03 | 0.51  | 3.0E-10 | 4.5E-08 |
| ILMN_1763080 | 5859   | QARS     |                                                             | -0.31 | 1.1E-04 | 2.8E-03 | -0.42 | 3.3E-07 | 1.2E-05 |
| ILMN_1760635 | 5889   | RAD51C   | E2F TARGETS                                                 | 0.45  | 9.6E-09 | 3.4E-06 | 0.56  | 1.9E-12 | 6.7E-10 |
| ILMN_1739810 | 10743  | RAI1     |                                                             | -0.45 | 1.2E-08 | 3.9E-06 | -0.43 | 1.6E-07 | 6.8E-06 |
| ILMN_1806266 | 5910   | RAP1GDS1 | FATTY ACID METABOLISM                                       | 0.33  | 3.9E-05 | 1.3E-03 | 0.52  | 6.8E-11 | 1.3E-08 |
| ILMN_1660723 | 112724 | RDH13    |                                                             | -0.30 | 1.8E-04 | 4.0E-03 | -0.40 | 1.7E-06 | 4.4E-05 |
| ILMN_1669310 | 89941  | RHOT2    | OXPHOS; MITOTIC SPINDLE                                     | -0.34 | 2.5E-05 | 9.4E-04 | -0.44 | 7.8E-08 | 3.8E-06 |
| ILMN_2119535 | 8737   | RIPK1    |                                                             | -0.29 | 3.7E-04 | 6.8E-03 | -0.39 | 2.8E-06 | 6.8E-05 |
| ILMN_1774823 | 6164   | RPL34    | MYC TARGETS V1                                              | 0.35  | 9.1E-06 | 4.5E-04 | 0.54  | 1.8E-11 | 4.4E-09 |
| ILMN_1728975 | 6341   | SCO1     |                                                             | 0.39  | 7.5E-07 | 7.5E-05 | 0.37  | 1.0E-05 | 1.9E-04 |
| ILMN_1701655 | 80024  | SLC24A6  |                                                             | -0.30 | 1.6E-04 | 3.7E-03 | -0.47 | 7.2E-09 | 5.8E-07 |
| ILMN_1810727 | 283130 | SLC25A45 |                                                             | -0.28 | 4.4E-04 | 7.7E-03 | -0.39 | 3.6E-06 | 8.2E-05 |
| ILMN_1720311 | 91137  | SLC25A46 |                                                             | 0.38  | 1.5E-06 | 1.2E-04 | 0.48  | 6.9E-09 | 5.6E-07 |
| ILMN_1800425 | 6548   | SLC9A1   |                                                             | -0.33 | 4.8E-05 | 1.5E-03 | -0.40 | 2.0E-06 | 5.1E-05 |
| ILMN_1661945 | 81892  | SLRP     |                                                             | 0.30  | 1.8E-04 | 4.1E-03 | 0.51  | 1.8E-10 | 2.9E-08 |
| ILMN_1728168 | 51012  | SLMO2    |                                                             | 0.31  | 1.4E-04 | 3.4E-03 | 0.43  | 1.4E-07 | 6.3E-06 |
| ILMN_1754529 | 6687   | SPG7     |                                                             | -0.40 | 3.9E-07 | 4.6E-05 | -0.53 | 4.1E-11 | 9.2E-09 |
| ILMN_2192032 | 6728   | SRP19    |                                                             | 0.29  | 4.1E-04 | 7.2E-03 | 0.46  | 2.1E-08 | 1.3E-06 |
| ILMN_1809478 | 6742   | SSBP1    | MYC TARGETS V1                                              | 0.37  | 2.4E-06 | 1.7E-04 | 0.48  | 3.9E-09 | 3.5E-07 |
| ILMN_1660787 | 8803   | SUCLA2   | OXPHOS; FATTY ACID METABOLISM                               | 0.43  | 4.0E-08 | 9.4E-06 | 0.45  | 3.4E-08 | 2.0E-06 |
| ILMN_1711994 | 10312  | TCIRG1   | OXPHOS                                                      | -0.32 | 6.5E-05 | 1.9E-03 | -0.41 | 8.5E-07 | 2.6E-05 |
| ILMN_1722239 | 1678   | TIMM8A   |                                                             | 0.29  | 2.9E-04 | 5.6E-03 | 0.48  | 2.9E-09 | 2.7E-07 |
| ILMN_1653709 | 26520  | TIMM9    | OXPHOS                                                      | 0.33  | 2.9E-05 | 1.0E-03 | 0.49  | 1.6E-09 | 1.7E-07 |
| ILMN_2175265 | 8834   | TMEM11   |                                                             | 0.28  | 4.1E-04 | 7.3E-03 | 0.54  | 1.4E-11 | 3.5E-09 |
| ILMN_2217809 | 84233  | TMEM126A |                                                             | 0.35  | 1.5E-05 | 6.4E-04 | 0.46  | 1.7E-08 | 1.1E-06 |
| ILMN_1766851 | 55863  | TMEM126B |                                                             | 0.41  | 2.2E-07 | 3.0E-05 | 0.45  | 5.4E-08 | 2.9E-06 |
| ILMN_1808661 | 401505 | TOMM5    |                                                             | 0.50  | 5.0E-11 | 7.0E-08 | 0.66  | 1.7E-18 | 1.9E-15 |
| ILMN_1706558 | 55006  | TRMT61B  |                                                             | 0.33  | 3.7E-05 | 1.3E-03 | 0.42  | 4.8E-07 | 1.7E-05 |
| ILMN_1680314 | 7295   | TXN      | GLYCOLYSIS                                                  | 0.44  | 1.6E-08 | 4.9E-06 | 0.59  | 4.3E-14 | 2.6E-11 |
| ILMN_1737585 | 57176  | VARS2    |                                                             | -0.32 | 8.5E-05 | 2.3E-03 | -0.43 | 3.1E-07 | 1.2E-05 |
| ILMN_1750088 | 7444   | VRK2     |                                                             | 0.40  | 4.4E-07 | 5.0E-05 | 0.47  | 1.8E-08 | 1.2E-06 |
| ILMN_1734316 | 10730  | YME1L1   |                                                             | 0.33  | 3.7E-05 | 1.3E-03 | 0.45  | 5.3E-08 | 2.8E-06 |
| ILMN_1789492 | 29801  | ZDHHC8   |                                                             | -0.39 | 7.7E-07 | 7.7E-05 | -0.40 | 1.4E-06 | 3.9E-05 |
| ILMN_1760718 | 83637  | ZMIZ2    |                                                             | -0.36 | 4.4E-06 | 2.8E-04 | -0.49 | 1.7E-09 | 1.7E-07 |

**Table S4A. Cellular compartments enriched in a list of genes downregulated by a factor of at least 1.5 under acute hypoxia in either HeLa or SiHa cells**

Top 20 cellular components from GSEA analysis are listed.

| Gene Set Name                       | # Genes in Gene Set (K) | # Genes in Overlap (k) | p-value  | FDR q-value |
|-------------------------------------|-------------------------|------------------------|----------|-------------|
| GO_NUCLEOLUS                        | 848                     | 145                    | 1.62E-78 | 9.38E-76    |
| GO_MITOCHONDRION                    | 1633                    | 192                    | 8.70E-76 | 2.52E-73    |
| GO_RIBONUCLEOPROTEIN_COMPLEX        | 721                     | 125                    | 2.89E-68 | 5.59E-66    |
| GO_CHROMOSOME                       | 880                     | 135                    | 6.23E-67 | 9.03E-65    |
| GO_ENVELOPE                         | 1090                    | 147                    | 2.36E-65 | 2.74E-63    |
| GO_MITOCHONDRIAL_PART               | 953                     | 129                    | 2.03E-57 | 1.96E-55    |
| GO_MICROTUBULE_CYTOSKELETON         | 1068                    | 128                    | 6.60E-51 | 5.47E-49    |
| GO_CHROMOSOMAL_REGION               | 330                     | 74                     | 8.65E-49 | 6.27E-47    |
| GO_MITOCHONDRIAL_ENVELOPE           | 691                     | 101                    | 5.01E-48 | 3.23E-46    |
| GO_CHROMOSOME_CENTROMERIC_REGION    | 174                     | 54                     | 4.74E-44 | 2.75E-42    |
| GO_CYTOSKELETAL_PART                | 1436                    | 133                    | 2.61E-40 | 1.37E-38    |
| GO_ORGANELLE_INNER_MEMBRANE         | 525                     | 79                     | 1.28E-38 | 6.17E-37    |
| GO_CONDENSED_CHROMOSOME             | 195                     | 51                     | 1.58E-37 | 7.03E-36    |
| GO_CENTROSOME                       | 487                     | 71                     | 6.74E-34 | 2.79E-32    |
| GO_CYTOSKELETON                     | 1967                    | 146                    | 2.20E-33 | 8.49E-32    |
| GO_MICROTUBULE_ORGANIZING_CENTER    | 623                     | 78                     | 1.75E-32 | 6.35E-31    |
| GO_MITOCHONDRIAL_MATRIX             | 412                     | 63                     | 2.07E-31 | 7.08E-30    |
| GO_SPINDLE                          | 289                     | 53                     | 1.31E-30 | 4.23E-29    |
| GO_KINETOCHORE                      | 120                     | 37                     | 1.81E-30 | 5.52E-29    |
| GO_CONDENSED_CHROMOSOME_CENTROMERIC | 102                     | 34                     | 2.09E-29 | 6.06E-28    |

**Table S4B. Hallmarks enriched in a list of genes downregulated by a factor of at least 1.5 under acute hypoxia in either HeLa or SiHa cells**

Top 20 hallmarks from GSEA analysis are listed.

| Gene Set Name                      | # Genes in Gene Set (K) | # Genes in Overlap (k) | p-value  | FDR q-value |
|------------------------------------|-------------------------|------------------------|----------|-------------|
| HALLMARK_E2F_TARGETS               | 200                     | 81                     | 1.48E-76 | 7.41E-75    |
| HALLMARK_G2M_CHECKPOINT            | 200                     | 71                     | 2.45E-62 | 6.13E-61    |
| HALLMARK_MYC_TARGETS_V1            | 200                     | 58                     | 2.45E-45 | 4.09E-44    |
| HALLMARK_MYC_TARGETS_V2            | 58                      | 32                     | 1.68E-36 | 2.09E-35    |
| HALLMARK_MTORC1_SIGNALING          | 200                     | 46                     | 2.81E-31 | 2.81E-30    |
| HALLMARK_UNFOLDED_PROTEIN_RESPONSE | 113                     | 21                     | 4.35E-13 | 3.63E-12    |
| HALLMARK_CHOLESTEROL_HOMEOSTASIS   | 74                      | 17                     | 1.97E-12 | 1.41E-11    |
| HALLMARK_ESTROGEN_RESPONSE_LATE    | 200                     | 24                     | 1.54E-10 | 8.57E-10    |
| HALLMARK_OXIDATIVE_PHOSPHORYLATION | 200                     | 24                     | 1.54E-10 | 8.57E-10    |
| HALLMARK_MITOTIC_SPINDLE           | 200                     | 22                     | 4.60E-09 | 2.27E-08    |
| HALLMARK_DNA_REPAIR                | 150                     | 19                     | 4.99E-09 | 2.27E-08    |
| HALLMARK_UV_RESPONSE_UP            | 158                     | 19                     | 1.19E-08 | 4.95E-08    |
| HALLMARK_FATTY_ACID_METABOLISM     | 158                     | 18                     | 6.64E-08 | 2.55E-07    |
| HALLMARK_ADIPOGENESIS              | 200                     | 18                     | 2.22E-06 | 7.92E-06    |
| HALLMARK_GLYCOLYSIS                | 200                     | 17                     | 9.02E-06 | 3.01E-05    |
| HALLMARK_APOPTOSIS                 | 161                     | 15                     | 1.00E-05 | 3.13E-05    |
| HALLMARK_ESTROGEN_RESPONSE_EARLY   | 200                     | 16                     | 3.46E-05 | 9.93E-05    |
| HALLMARK_ANDROGEN_RESPONSE         | 101                     | 11                     | 3.58E-05 | 9.93E-05    |
| HALLMARK_PI3K_AKT_MTOR_SIGNALING   | 105                     | 11                     | 5.13E-05 | 1.35E-04    |
| HALLMARK_SPERMATOGENESIS           | 135                     | 12                     | 1.19E-04 | 2.97E-04    |

**Table S4C. Genes encoding mitochondria proteins\* downregulated by a factor of at least 1.5 under acute hypoxia in either HeLa or SiHa cells**

\* Cellular component ontology terms: Mitochondrion, Mitochondrion\_part, Mitochondrion\_envelope, Mitochondrial\_matrix

| PROBE_ID     | Entrez ID | Gene Symbol | Hallmark       |
|--------------|-----------|-------------|----------------|
| ILMN_1676846 | 6059      | ABCE1       | MYC TARGETS V1 |
| ILMN_2284941 | 10061     | ABCF2       |                |
| ILMN_2338268 | 83451     | ABHD11      |                |
| ILMN_1667641 | 31        | ACACA       |                |
| ILMN_2098743 | 55856     | ACOT13      |                |
| ILMN_2252621 | 11332     | ACOT7       |                |
| ILMN_2066124 | 10939     | AFG3L2      | OXPHOS         |
| ILMN_1707169 | 79814     | AGMAT       |                |
| ILMN_1757807 | 64850     | AGXT2L1     |                |
| ILMN_1667183 | 9131      | AIFM1       | OXPHOS         |
| ILMN_1794825 | 224       | ALDH3A2     |                |
| ILMN_1652505 | 27301     | APEX2       |                |
| ILMN_1721623 | 79135     | APOO        |                |
| ILMN_1662895 | 84334     | APOPT1      |                |
| ILMN_1738530 | 55210     | ATAD3A      |                |
| ILMN_2131936 | 83858     | ATAD3B      |                |
| ILMN_1673991 | 471       | ATIC        |                |
| ILMN_2341363 | 498       | ATP5A1      | OXPHOS         |
| ILMN_1721989 | 515       | ATP5F1      | OXPHOS         |
| ILMN_1712430 | 516       | ATP5G1      | OXPHOS         |
| ILMN_1809027 | 55101     | ATP5SL      |                |
| ILMN_1768396 | 54998     | AURKAIP1    |                |
| ILMN_1738529 | 617       | BCS1L       |                |
| ILMN_2311089 | 672       | BRCA1       |                |
| ILMN_1693410 | 140707    | BRI3BP      |                |
| ILMN_1666967 | 51660     | BRP44L      | OXPHOS         |
| ILMN_1783333 | 56942     | C16orf61    |                |
| ILMN_1798728 | 8725      | C19orf2     |                |
| ILMN_1668996 | 708       | C1QBP       | MYC TARGETS V1 |
| ILMN_2262543 | 79133     | C20orf7     |                |
| ILMN_2394132 | 55471     | C2orf56     |                |
| ILMN_1813236 | 221545    | C6orf136    |                |
| ILMN_1793012 | 55744     | C7orf44     |                |
| ILMN_1779751 | 154791    | C7orf55     |                |
| ILMN_1709043 | 55848     | C9orf46     |                |
| ILMN_1736568 | 835       | CASP2       |                |
| ILMN_1786046 | 842       | CASP9       |                |
| ILMN_1775919 | 63933     | CCDC90A     |                |
| ILMN_1747911 | 983       | CDK1        |                |
| ILMN_1679971 | 84902     | CEP89       |                |
| ILMN_1740170 | 400916    | CHCHD10     |                |
| ILMN_1813938 | 131474    | CHCHD4      |                |
| ILMN_2352326 | 80347     | COASY       |                |

|              |        |          |                    |
|--------------|--------|----------|--------------------|
| ILMN_1801378 | 51805  | COQ3     |                    |
| ILMN_2382758 | 1385   | CREB1    |                    |
| ILMN_1709775 | 1431   | CS       | OXPHOS             |
| ILMN_1685796 | 7812   | CSDE1    |                    |
| ILMN_2382488 | 348180 | CTU2     |                    |
| ILMN_1684321 | 80777  | CY5B     |                    |
| ILMN_1815115 | 1537   | CYC1     | MYC TARGETS V1     |
| ILMN_1676191 | 55157  | DARS2    |                    |
| ILMN_2090123 | 54505  | DHX29    |                    |
| ILMN_2403555 | 22907  | DHX30    |                    |
| ILMN_2310589 | 56616  | DIABLO   |                    |
| ILMN_1803312 | 27292  | DIMT1    |                    |
| ILMN_1664682 | 1763   | DNA2     |                    |
| ILMN_1672496 | 3301   | DNAJA1   |                    |
| ILMN_1662334 | 9093   | DNAJA3   |                    |
| ILMN_2112049 | 728489 | DNLZ     |                    |
| ILMN_2152768 | 1841   | DTYMK    |                    |
| ILMN_1718044 | 60528  | ELAC2    |                    |
| ILMN_2139827 | 113115 | FAM54A   |                    |
| ILMN_1758728 | 2189   | FANCG    |                    |
| ILMN_1784871 | 2194   | FASN     |                    |
| ILMN_2129859 | 79072  | FASTKD3  |                    |
| ILMN_1656189 | 112812 | FDX1L    |                    |
| ILMN_2160929 | 2237   | FEN1     |                    |
| ILMN_1719392 | 2271   | FH       | OXPHOS, OXPHOS     |
| ILMN_1730325 | 80308  | FLAD1    |                    |
| ILMN_1661596 | 28982  | FLVCR1   |                    |
| ILMN_1762312 | 55572  | FOXRED1  |                    |
| ILMN_1725471 | 2710   | GK       |                    |
| ILMN_1737912 | 51022  | GLRX2    |                    |
| ILMN_3251251 | 54552  | GNL3L    |                    |
| ILMN_1656145 | 2805   | GOT1     |                    |
| ILMN_1686587 | 84705  | GTPBP3   |                    |
| ILMN_1719906 | 3033   | HADH     |                    |
| ILMN_1787762 | 55127  | HEATR1   |                    |
| ILMN_1656977 | 26275  | HIBCH    |                    |
| ILMN_1673711 | 3326   | HSP90AB1 | MYC TARGETS V1     |
| ILMN_1774410 | 3329   | HSPD1    | MYC TARGETS V1, V2 |
| ILMN_1803775 | 3336   | HSPE1    | MYC TARGETS V1, V2 |
| ILMN_1769883 | 3416   | IDE      |                    |
| ILMN_2091347 | 3417   | IDH1     | OXPHOS             |
| ILMN_1789018 | 3609   | ILF3     |                    |
| ILMN_1735432 | 23479  | ISCU     | OXPHOS             |
| ILMN_1723211 | 79944  | L2HGDH   |                    |
| ILMN_1710668 | 3954   | LETM1    |                    |
| ILMN_2136423 | 92935  | MARS2    |                    |
| ILMN_1811367 | 27430  | MAT2B    |                    |
| ILMN_1767679 | 27349  | MCAT     |                    |
| ILMN_1803988 | 4170   | MCL1     |                    |
| ILMN_2048636 | 4200   | ME2      |                    |



|              |        |         |                |
|--------------|--------|---------|----------------|
| ILMN_1803005 | 25974  | MMACHC  |                |
| ILMN_1799106 | 64757  | MOSC1   |                |
| ILMN_1757134 | 84769  | MPV17L2 |                |
| ILMN_1690371 | 65003  | MRPL11  | OXPHOS         |
| ILMN_1699603 | 6182   | MRPL12  |                |
| ILMN_2103720 | 29088  | MRPL15  | OXPHOS         |
| ILMN_2230672 | 29074  | MRPL18  |                |
| ILMN_1693352 | 55052  | MRPL20  |                |
| ILMN_1654250 | 219927 | MRPL21  |                |
| ILMN_1663220 | 29093  | MRPL22  |                |
| ILMN_2398995 | 79590  | MRPL24  |                |
| ILMN_2230592 | 11222  | MRPL3   |                |
| ILMN_1749432 | 64983  | MRPL32  |                |
| ILMN_1783681 | 64981  | MRPL34  | OXPHOS         |
| ILMN_1753016 | 51318  | MRPL35  | OXPHOS         |
| ILMN_2041327 | 51253  | MRPL37  |                |
| ILMN_1719656 | 64978  | MRPL38  |                |
| ILMN_1681230 | 51073  | MRPL4   |                |
| ILMN_2356895 | 28977  | MRPL42  |                |
| ILMN_1722838 | 26589  | MRPL46  |                |
| ILMN_1681324 | 740    | MRPL49  |                |
| ILMN_2097421 | 51258  | MRPL51  |                |
| ILMN_1810866 | 6183   | MRPS12  | OXPHOS         |
| ILMN_1804851 | 51373  | MRPS17  |                |
| ILMN_2085903 | 51023  | MRPS18C |                |
| ILMN_1726743 | 10884  | MRPS30  | OXPHOS         |
| ILMN_2189993 | 60488  | MRPS35  |                |
| ILMN_1760441 | 64969  | MRPS5   |                |
| ILMN_1701306 | 92399  | MRRF    |                |
| ILMN_2175831 | 123263 | MTFMT   |                |
| ILMN_3251555 | 55149  | MTPAP   |                |
| ILMN_1667222 | 4580   | MTX1    |                |
| ILMN_2336970 | 4595   | MUTYH   |                |
| ILMN_2386040 | 80179  | MYO19   |                |
| ILMN_1791119 | 4705   | NDUFA10 |                |
| ILMN_1737738 | 55967  | NDUFA12 |                |
| ILMN_1682857 | 91942  | NDUFAF2 |                |
| ILMN_2205350 | 29078  | NDUFAF4 | MYC TARGETS V2 |
| ILMN_1794132 | 4728   | NDUFS8  | OXPHOS         |
| ILMN_1742089 | 57486  | NLN     |                |
| ILMN_1741133 | 4830   | NME1    | MYC TARGETS V1 |
| ILMN_1665442 | 65083  | NOL6    |                |
| ILMN_1774281 | 51559  | NT5DC3  |                |
| ILMN_2227968 | 4913   | NTHL1   |                |
| ILMN_3244030 | 92106  | OXNAD1  |                |
| ILMN_1763884 | 51025  | PAM16   |                |
| ILMN_1772058 | 80025  | PANK2   |                |
| ILMN_2159044 | 64146  | PDF     |                |
| ILMN_2080611 | 23590  | PDSS1   |                |
| ILMN_1748027 | 192111 | PGAM5   |                |

|              |        |          |                        |
|--------------|--------|----------|------------------------|
| ILMN_1692651 | 5245   | PHB      | MYC TARGETS V1, V2     |
| ILMN_1689525 | 5366   | PMAIP1   |                        |
| ILMN_1800855 | 160760 | PPTC7    |                        |
| ILMN_2179652 | 27166  | PRELID1  |                        |
| ILMN_2225709 | 26024  | PTCD1    |                        |
| ILMN_2345015 | 80142  | PTGES2   |                        |
| ILMN_1763842 | 138428 | PTRH1    |                        |
| ILMN_1683052 | 51651  | PTRH2    |                        |
| ILMN_1672157 | 80324  | PUS1     | MYC TARGETS V2         |
| ILMN_1733407 | 79691  | QTRTD1   |                        |
| ILMN_1695386 | 5889   | RAD51C   |                        |
| ILMN_1660723 | 112724 | RDH13    |                        |
| ILMN_2197365 | 5997   | RGS2     |                        |
| ILMN_2053536 | 54933  | RHBDL2   |                        |
| ILMN_1685661 | 51018  | RRP15    |                        |
| ILMN_1757415 | 65260  | SELRC1   |                        |
| ILMN_1770848 | 119559 | SFXN4    |                        |
| ILMN_1668012 | 10165  | SLC25A13 |                        |
| ILMN_1666553 | 60386  | SLC25A19 |                        |
| ILMN_1665838 | 29957  | SLC25A24 |                        |
| ILMN_1811235 | 114789 | SLC25A25 |                        |
| ILMN_1790472 | 81894  | SLC25A28 |                        |
| ILMN_1788498 | 5250   | SLC25A3  | OXPHOS, MYC TARGETS V1 |
| ILMN_1743911 | 51629  | SLC25A39 |                        |
| ILMN_1700831 | 11001  | SLC27A2  |                        |
| ILMN_1661945 | 81892  | SLIRP    |                        |
| ILMN_2285375 | 6652   | SORD     | MYC TARGETS V2         |
| ILMN_1685112 | 51204  | TACO1    |                        |
| ILMN_2096784 | 7022   | TFAP2C   |                        |
| ILMN_1765332 | 26519  | TIMM10   | OXPHOS                 |
| ILMN_1784031 | 10469  | TIMM44   |                        |
| ILMN_1722239 | 1678   | TIMM8A   |                        |
| ILMN_2217809 | 84233  | TMEM126A |                        |
| ILMN_2145518 | 55863  | TMEM126B |                        |
| ILMN_1683475 | 10452  | TOMM40   |                        |
| ILMN_1746426 | 9868   | TOMM70A  | OXPHOS, MYC TARGETS V1 |
| ILMN_1812940 | 55621  | TRMT1    |                        |
| ILMN_1673872 | 57570  | TRMT5    |                        |
| ILMN_1655052 | 51095  | TRNT1    |                        |
| ILMN_2038776 | 7295   | TXN      |                        |
| ILMN_2324421 | 7296   | TXNRD1   |                        |
| ILMN_2191428 | 7314   | UBB      |                        |
| ILMN_1651872 | 29914  | UBIAD1   |                        |
| ILMN_1685625 | 7351   | UCP2     |                        |
| ILMN_2366710 | 29796  | UQCR10   | OXPHOS                 |
| ILMN_1702130 | 7407   | VARS     |                        |
| ILMN_1750088 | 7444   | VRK2     |                        |
| ILMN_1659000 | 63929  | XPNPEP3  |                        |
| ILMN_1736008 | 79693  | YRDC     |                        |
